# Traffic Lights in *Trichodesmium*. Regulation of Photosynthesis for Nitrogen Fixation Studied by Chlorophyll Fluorescence Kinetic Microscopy<sup>1</sup>

Hendrik Küpper\*, Naila Ferimazova, Ivan Šetlík, and Ilana Berman-Frank

Mathematisch-Naturwissenschaftliche Sektion, Fachbereich Biologie, Universität Konstanz, D-78457 Konstanz, Germany (H.K.); Faculty of Biological Sciences and Institute of Physical Biology, University of South Bohemia, CZ-370 05 Ceske Budejovice, Czech Republic (H.K., N.F., I.S.); Institute of Microbiology, Department of Autotrophic Microorganisms, Academy of Sciences of the Czech Republic, CZ-37981 Trebon, Czech Republic (N.F., I.S.); and Faculty of Life Sciences, Bar Ilan University, Ramat Gan 52900, Israel (I.B.-F.)

We investigated interactions between photosynthesis and nitrogen fixation in the non-heterocystous marine cyanobacterium *Trichodesmium* IMS101 at the single-cell level by two-dimensional (imaging) microscopic measurements of chlorophyll fluorescence kinetics. Nitrogen fixation was closely associated with the appearance of cells with high basic fluorescence yield ( $F_0$ ), termed bright cells. In cultures aerated with normal air, both nitrogen fixation and bright cells appeared in the middle of the light phase. In cultures aerated with 5% oxygen, both processes occurred at a low level throughout most of the day. Under 50% oxygen, nitrogen fixation commenced at the beginning of the light phase but declined soon afterwards. Rapid reversible switches between fluorescence levels were observed, which indicated that the elevated  $F_0$  of the bright cells originates from reversible uncoupling of the photosystem II (PSII) antenna from the PSII reaction center. Two physiologically distinct types of bright cells were observed. Type I had about double  $F_0$  compared to the normal  $F_0$  in the dark phase and a PSII activity, measured as variable fluorescence ( $F_v = F_m - F_0$ ), similar to normal non-diazotrophic cells. Correlation of type I cells with nitrogen fixation, oxygen concentration, and light suggests that this physiological state is connected to an up-regulation of the Mehler reaction, resulting in oxygen consumption despite functional PSII. Type II cells had more than three times the normal  $F_0$  and hardly any PSII activity measurable by variable fluorescence. They did not occur under low-oxygen concentrations, but appeared under high-oxygen levels outside the diazotrophic period, suggesting that this state represents a reaction to oxidative stress not necessarily connected to nitrogen fixation. In addition to the two high-fluorescence states, cells were observed to reversibly enter a low-fluorescence state. This occurred mainly after a cell went through its bright phase and may represent a fluorescence-quenching recovery phase.

Biological fixation of atmospheric nitrogen is performed by certain cyanobacteria when bioavailable forms of nitrogen (nitrate and ammonia) are limited. Nitrogen fixation is catalyzed by an essentially anaerobic enzyme, nitrogenase, which is irreversibly inhibited *in vitro* when exposed to molecular oxygen (for review, see Postgate, 1998). Diazotrophic cyanobacteria are the only nitrogen-fixing organisms that produce molecular oxygen as a by-product of photosynthesis and must prevent nitrogenase from being damaged by oxygenic photosynthesis (for review, see Gallon, 1992, 2001; Bergman et al., 1997; Berman-Frank et al., 2003). Most diazotrophic cyanobacteria achieve this by separating photosynthesis and nitrogen fixation either

spatially, by differentiating highly specialized cells called heterocysts, or temporally, by fixing nitrogen at night (usually found in unicellular diazotrophic cyanobacteria). In contrast, filamentous non-heterocystous marine cyanobacteria of the genus *Trichodesmium* execute both processes during the light period without irreversible differentiation of specialized cells. Nitrogen fixation by *Trichodesmium* contributes a significant proportion to the total marine nitrogen fixation and to the addition of new nitrogen inputs in the tropical and subtropical oceans (Capone et al., 1997). Early studies on nitrogen fixation by *Trichodesmium* have shown light-dependent, DCMU-sensitive oxygen consumption by the Mehler reaction (Kana, 1993), as well as an unusually high dark respiration rate (Kana, 1993; Carpenter and Roenneberg, 1995), suggesting that oxygen-consuming mechanisms protect nitrogenase. Immunolocalization showed that nitrogenase is not simultaneously expressed in all cells of the filaments (called trichomes), showing that a partial differentiation is involved in the  $N_2$  fixation strategy of *Trichodesmium* (Lin et al., 1998). Moreover, nitrogenase genes in *Trichodesmium* are not significantly different from other cyanobacteria (Sroga et al., 1996; Zehr et al.,

<sup>1</sup> This work was supported by the Ministry of Education of the Czech Republic (grant nos. LN00A141 and MSM123100004), by the Academy of Sciences of the Czech Republic (grant no. AV0Z5020903), by a fellowship from the Alexander von Humboldt Foundation (to H.K.), and by a grant from Bar Ilan University (to I.B.-F.).

\* Corresponding author; e-mail hk282@cornell.edu; hendrik.kuepper@uni-konstanz.de; fax 607-255-2459.

Article, publication date, and citation information can be found at [www.plantphysiol.org/cgi/doi/10.1104/pp.104.045963](http://www.plantphysiol.org/cgi/doi/10.1104/pp.104.045963).

1997), indicating that the coexistence of photosynthesis and nitrogen fixation is not related to a special type of nitrogenase.

Measurements of chlorophyll (Chl) fluorescence kinetics yield comprehensive information about the regulation of photosynthesis in cyanobacteria (e.g. for review, see Campbell et al., 1998), and has led to the discovery and better understanding of diel activity cycles in *Cyanothece* sp. (Meunier et al., 1997, 1998; for review, see Sherman et al., 1998), *Synechococcus* sp. (Behrenfeld and Kolber, 1999), and *Plectonema boryanum* (Misra and Mahajan, 2000). We utilized the newly developed technique of Chl fluorescence kinetic microscopy (FKM; Küpper et al., 2000a) to resolve the spatial and temporal patterns of photosynthetic activity in *Trichodesmium* in relation to nitrogen fixation (Berman-Frank et al., 2001b). Thus, we have shown that *Trichodesmium* trichomes have a homogeneous high photosynthetic yield during most of the day, and perform a reversible partial differentiation of cells for the period of nitrogen fixation. This partial differentiation involves a decline in oxygen production by enhancing the Mehler reaction correlated to a reversible down-regulation of PSII activity (Berman-Frank et al., 2001b). Chl FKM (Küpper et al., 2000a) revealed that, during the period of high nitrogen fixation, some cells had a much higher Chl fluorescence yield than all the cells sampled when no nitrogen fixation occurs; these cells have been termed bright zones/cells (Berman-Frank et al., 2001b). Limitations in the detection system used at the time restricted our investigation to measuring the basic fluorescence yield ( $F_0$ ) and the maximum activity of PSII ( $F_v/F_m$ ) of individual *Trichodesmium* cells. Hence, it remained unknown in which way *Trichodesmium* regulates the performance of PSII to allow nitrogen fixation in the middle of the photoperiod.

In this study, improvements to the FKM (Ferimazova et al., 2002) allowed a more detailed analysis of Chl fluorescence kinetics in nitrogen-fixing *Trichodesmium* cells, and revealed a complex pattern of photosynthetic regulation. The two-dimensional (imaging) fluorescence kinetic measurements were combined with traditional measurements of nitrogen fixation and counts of the percentage of the bright cells. These investigations were done in *Trichodesmium* cultures grown either at the normal (atmospheric) oxygen concentration or under stress caused by diminished or elevated oxygen levels.

## RESULTS

### Nitrogen Fixation, Chl Synthesis, and Percentage of Bright Cells

The cells of the control culture (air-grown cells) exhibited the typical diurnal activity pattern, i.e. a peak of nitrogen fixation after the first third of the light period (Fig. 1A) connected to the appearance of bright cells (Berman-Frank et al., 2001b). Now a quantitative

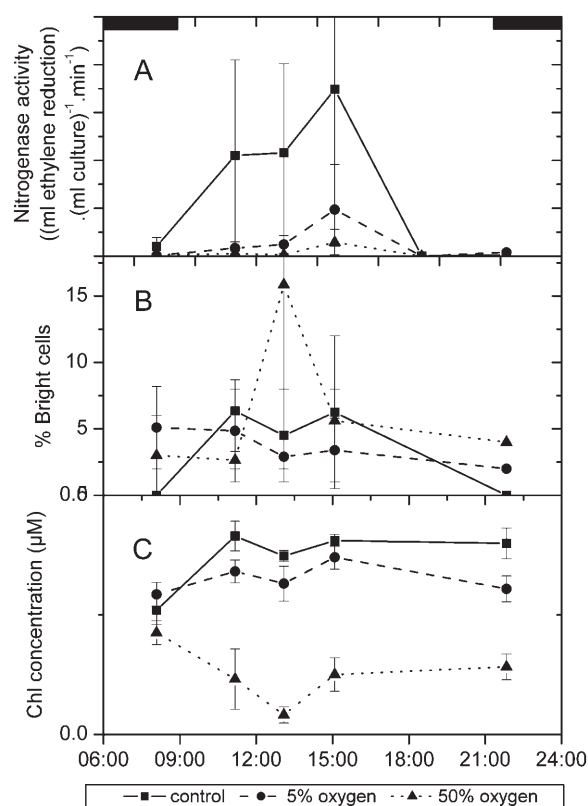

**Figure 1.** Comparison of nitrogen fixation activity and the percentage of bright cells in *Trichodesmium* IMS101 cultures grown at different oxygen concentrations. A, Nitrogenase activity per volume of culture. The data are not normalized to the Chl concentration (C), as the stress-induced Chl bleaching in the high-oxygen culture would cause misleading values of the total nitrogen fixation under these conditions. B, Percentage of bright cells (defined as more than double the basic fluorescence yield of the average in the dark period). C, Chl concentration per volume of culture.

correlation between the nitrogen fixation activity and the percentage of bright cells was found (Fig. 1, A and B). The beginning of nitrogen fixation was also associated with high activity of Chl synthesis (Fig. 1C). In cultures grown under low (5%) oxygen, nitrogen fixation rates were much lower than in the control culture, and the peak was less pronounced (Fig. 1A). Nitrogenase activity again positively correlated with the frequency of bright cells, which were much less abundant than in the control, but occurred throughout the whole cycle (Fig. 1B). Chl concentrations did not increase significantly ( $P = 0.05$ ) over the time of analysis in this culture (Fig. 1C). In cultures grown under high (50%) oxygen, the nitrogen fixation over the day was lower than in the low-oxygen culture and much diminished compared to the control (Fig. 1A). This was accompanied by a decrease in Chl concentration over the day, with a pronounced Chl loss in the middle of the light period and a slight recovery towards its end (Fig. 1C). We always observed a higher percentage of bright cells in the high-oxygen culture during the scotoperiod as compared with the control

(air) culture. The pattern of the percentage of bright cells in the 50% oxygen culture was less reproducible during the photoperiod (Fig. 1B).

## FKM Measurements

### Control Culture

**Basic Fluorescence Yield.** Dramatic changes in the basic fluorescence ( $F_0$ ) of individual cells characterized the fluorescence kinetics of *Trichodesmium*. The time course of these changes in  $F_0$  was correlated with that of the other events during the diurnal activity cycle.

Figure 2 shows the changes of the basic fluorescence yield ( $F_0$ ) in the diazotrophic versus the non-diazotrophic period of the diurnal activity cycle. As seen in Figure 2A, during the scotophase the cell population of the control culture was rather homogeneous, i.e. the distribution of  $F_0$  values formed a single, rather narrow, approximately Gaussian peak. The remaining variability was mainly between filaments, not between cells of the same filament (see Berman-Frank et al., 2001b), and was caused partially by the inherent noise of the measurement. In contrast, at the peak of nitrogen fixation (see above), a large number of bright cells occurred with  $F_0$  values several times higher than the average of normal cells (Fig. 2B). The bright cells consisted of two groups, which were different both in  $F_0$  and physiologically (see below). Additionally, cells with less than half the  $F_0$  compared to the normal non-diazotrophic state were observed during this period, leading a peak close to zero in the histogram of  $F_0$ . The basic fluorescence states (low, normal, high, and very high  $F_0$ ) are defined in Figure 2B.

Reversible switches between all four basic fluorescence states often occurred within minutes, sometimes even faster (Figs. 3 and 4). Cells often switched to high fluorescence yield immediately after the beginning or the end of actinic light exposure (Fig. 3). If several cells in a filament switched, they often did not do so randomly, but sequentially, reminiscent of traffic lights (Fig. 4). Changes of  $F_0$  during the measurement were related to the fluorescence state at its beginning, as demonstrated by correlating the basic fluorescence yield immediately before ( $F_0$ ) and after the actinic light period ( $F_0'$ ; Fig. 5A). Most of the bright cells ( $F_0 > 20$ ) returned to lower fluorescence yields, so that their  $F_0/F_0'$  was above one. In contrast, the low- and normal fluorescence cells tended to switch to the normal or the bright state, respectively, so that  $F_0/F_0'$  was below one. A disparity in the different rates of transitions between the activity states caused a difference in  $F_0/F_0'$ . In the low-fluorescence cells, this ratio was usually much further below one (down to 0.65), than it was above one for the bright cells (max. 1.08). The fastest observed switches were those from normal to higher fluorescence levels. A complete switch from the normal to the very bright state sometimes took less than 10 s (Fig. 3, A–C and E). Switches down from the bright or very bright states to normal or low  $F_0$  were usually in the

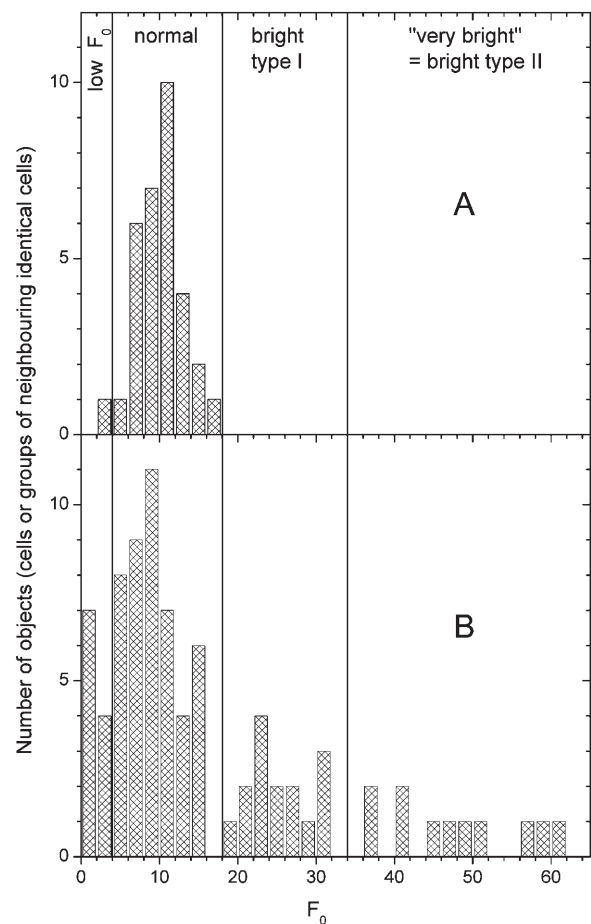

**Figure 2.** Distribution of intrinsic fluorescence values in the control culture during the diazotrophic phase compared with the dark phase and early light phase. Each data point in the graphs represents one cell or one group of neighboring cells in the same trichome that was identical in all fluorescence kinetic parameters. The same cells/objects were analyzed also for all parameters shown in Figures 5, 6 (for the respective time periods as defined below), and 7 (all data). The lines separate the fluorescence states. Cells with  $F_0 < 5$  were regarded as low  $F_0$ ,  $5 < F_0 < 18$  as normal,  $19 < F_0 < 35$  as bright type I, and  $F_0 > 35$  as very bright (bright type II). A, Distribution of fluorescence values between 9:00 PM and 10:30 AM, i.e. during the night and the early light phase. B, Distribution of fluorescence values between 12:30 PM and 6:30 PM, i.e. during the diazotrophic phase.

range of 1 to 5 min (Fig. 3, A, C, and E). Most of the switches occurred several minutes after the end of the actinic light, so that they were not manifested in the  $F_0/F_0'$  value. However, we did observe several cases of faster switches (Fig. 3, A and G), with the cell shown in Figure 3G switching before the termination of the actinic light.

**Photochemistry.** Variable fluorescence parameters, characterizing photochemical activity, also varied over the course of the daily activity cycle, yet their patterns differed from that of the changes in basic fluorescence yield. A decline in the dark-adapted maximal variable fluorescence ( $F_v = F_m - F_0$ ; Fig. 6D) was observed during the diazotrophic period. This indicates a



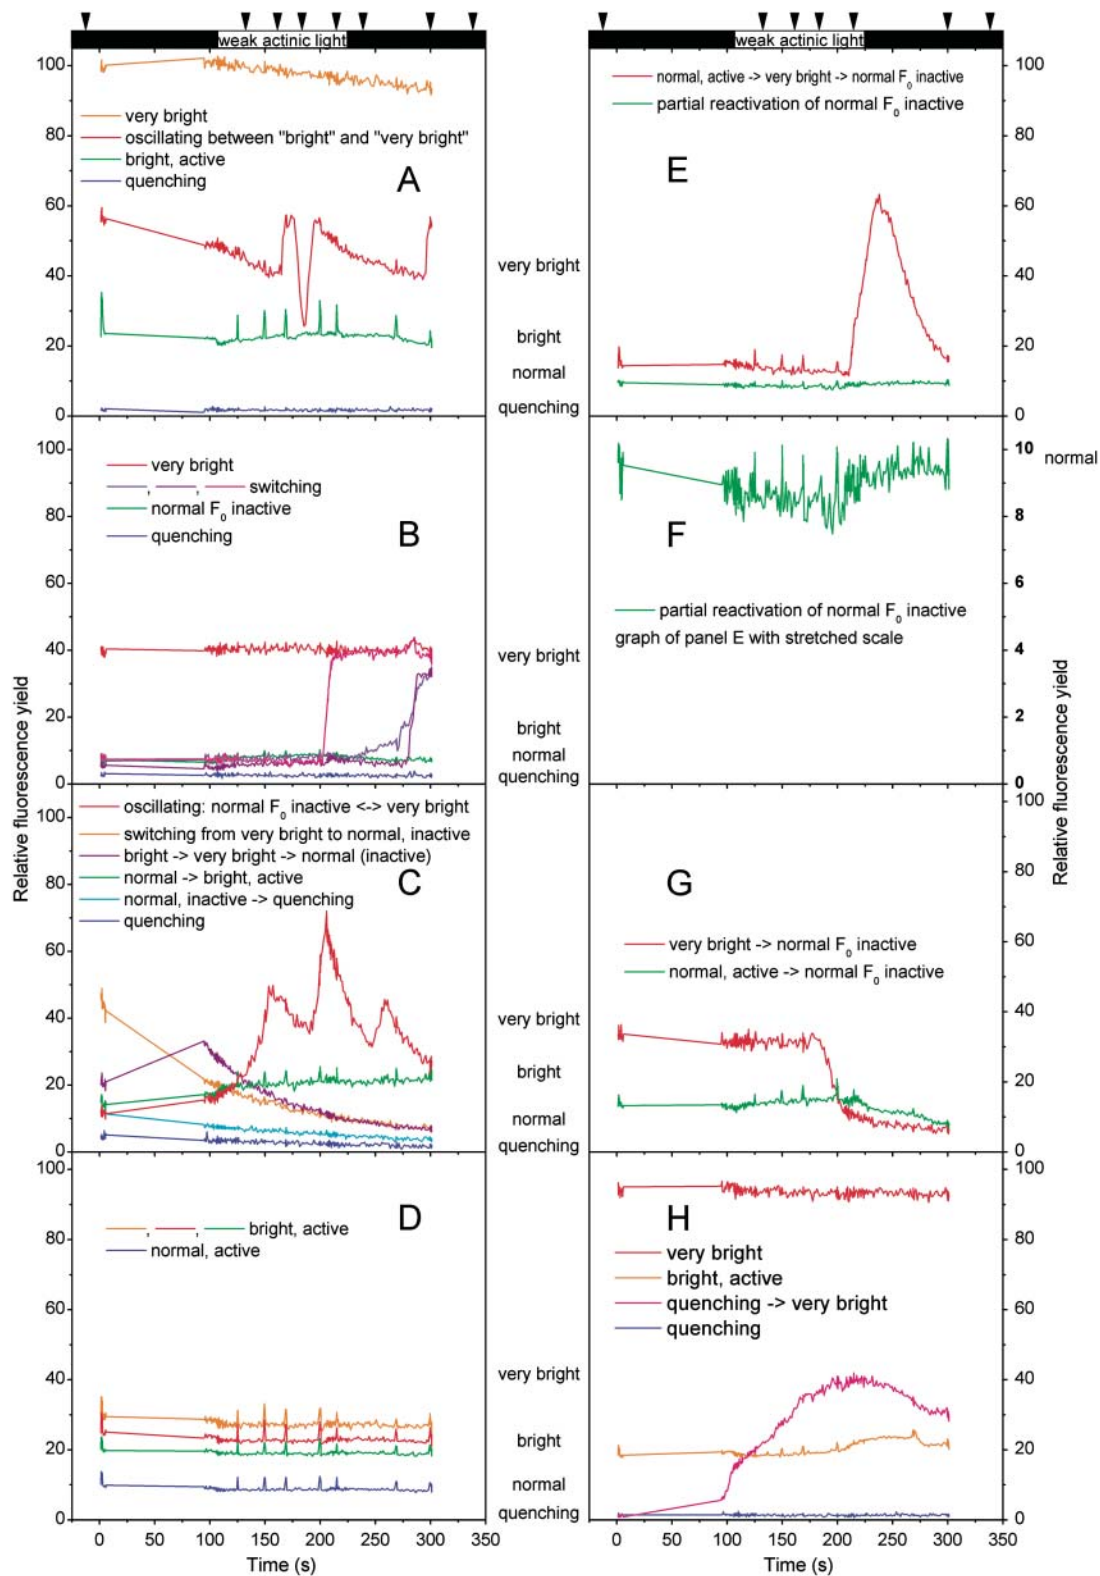

Figure 3. (Legend appears on following page.)

decline in the maximal photochemical yield of PSII, even without the normalization to  $F_m$  that would yield the standard parameter for the maximal photochemical yield of PSII,  $F_v/F_m$  (e.g. Maxwell and Johnson, 2000; Roháček, 2002). We assessed the variable fluorescence without the conventional normalization to  $F_m$  in order to separate the dramatic changes in  $F_0$  (Figs. 2 and 6A) from changes in the variable fluorescence proper; this was also done by Behrenfeld and Kolber (1999). The response to saturating flashes during actinic irradiance displayed a trend similar to that of the  $F_v$  values, both in its non-normalized ( $F'_m - F'_t$ ; not shown) and in its more conventional, normalized form ( $F'_m - F'_t/F'_m$ ) (Fig. 6G). The latter is believed to indicate the rate of electron transport through the electron transport chain (Genty et al., 1989).

The decrease in PSII activity, measured as  $F_v$ , occurred only in one type of bright cells, as revealed by a comparison of  $F_0$  and  $F_v$  (Figs. 5 and 7). Figure 5B shows the highest values of  $F_v$  in cells with normal  $F_0$  and, unexpectedly, in bright cells with an  $F_0$  up to 30. However, for the very bright cells ( $F_0 > 35$ ; Fig. 2), the  $F_v$  values became low. The distribution of the ( $F'_m - F'_t$ )/ $F'_m$  values (Fig. 5C) shows a similar distinction.

Using the activity data combined with the groups of basic fluorescence values, we devised a general classification of cells with different fluorescence properties related to the various metabolic phases of the *Trichodesmium* diurnal cycle (Fig. 7). The individual cell types differ in their fluorescence characteristics in the following way. The normal, non-diazotrophic cells had the highest dark-adapted efficiency of PSII, measured as  $F_v/F_m$ , and also the highest efficiency of PSII under actinic irradiance ( $F'_m - F'_t$ )/ $F'_m$ . However, calculated as  $F_v$  without normalization to  $F_m$ , the dark-adapted efficiency of PSII of bright cells was not different from that of normal cells. Only the very bright cells had about a 40% lower  $F_v$  (and, consequently, a drastically lower  $F_v/F_m$ ). And much of their  $F_v$  shown in Figure 7, was actually due to their tendency to return to lower fluorescence levels (Fig. 5A), leading to a decrease in  $F_0$  between the  $F_m$  and  $F_0$  measurement. The high noise in the  $F_v$  measurement of the very bright cells rendered the  $F_v$  differences between this group and the more active cell types (i.e. the normal and bright cells) only marginally statistically significant ( $P$  values of 0.051 and 0.054; see legend, Fig. 7). Measurements during actinic illumination accentuated the difference in PSII

activity between bright and very bright cells. Under these conditions, the non-normalized PSII activity ( $F'_m - F'_t$ ) of the very bright cells was only about 25% of the activity of the bright and normal cells. This is more significant because, in this study, the  $F'_m - F'_t$  values are more reliable than the  $F_v$  ( $F_v = F'_m - F_0$ ) values.  $F'_m$  was measured about a second after  $F'_t$  and was, therefore, unaffected by the slow decrease in basic fluorescence that distorted  $F_v$  in the very bright cells because  $F_0$  was measured 95 s after  $F_m$ .

The low-fluorescence cells showed both a much lower basic fluorescence yield ( $F_0$ ) as well as a proportionally diminished response to actinic ( $F_t$ ) and saturating light ( $F_m$ ,  $F'_m$ ; Fig. 7). The latter effect represents a diminished photochemical activity as seen in the non-normalized variable fluorescence ( $F_m - F_0$  or  $F'_m - F'_t$ ). Because of the almost proportional decrease of all fluorescence signals, however, normalization to  $F_m$  (yielding  $F_v/F_m$ ) or  $F'_m$  (yielding ( $F'_m - F'_t$ )/ $F'_m$ ) results in values that would normally indicate a relatively high photochemical activity.

The switches between active and inactive states (changes in  $F_v$ ) were generally much slower than those between low and high basic fluorescence yield (changes in  $F_0$ ). The transitions from high to low variable fluorescence were at least in the range of minutes (Fig. 3, C, E, and G), and the recovery from low to normal variable fluorescence usually in the range of hours (in the evening and night). In contrast, changes between the four states of basic fluorescence yield were often in the range of seconds. Because of this, low-fluorescence cells returned to normal  $F_0$  faster than to normal  $F_v$ ; this state is shown in Figure 7 as normal  $F_0$  inactive. The correlation of low variable with normal basic fluorescence led to very low  $F_v/F_m$  and ( $F'_m - F'_t$ )/ $F'_m$  values (Fig. 7). Only on rare occasions was a partial transition from normal  $F_0$  inactive to normal non-diazotrophic observed within a single measurement (Fig. 3, E and F). Normally, this transition could only be concluded from the comparison of samples taken at different times after the end of nitrogen fixation. Figure 8 presents a schematic overview of the observed transitions between the various states of basic fluorescence yield and activity, including examples of typical fluorescence kinetics.

*Nonphotochemical Quenching.* Changes in  $F_0$  levels (Figs. 5A and 8) strongly influenced the difference  $F_m - F'_m$  which is conventionally used (after normalization)

**Figure 3.** FKM traces of cells that exhibited particularly interesting switches in their basic fluorescence and/or activity. The curves were recorded on samples taken from the culture during the period of nitrogen fixation. A uniform measuring protocol was applied: a 2-s saturation flash at the start followed by a 3-s measurement of relaxation, a 95-s dark period without measurement for complete relaxation of the sample in the absence of measuring light, a 5-s  $F_0$  measurement, a 100-s actinic irradiance ( $60 \mu\text{mol m}^{-2} \text{s}^{-1}$ , 400–490 nm), and a dark period until the end of record. The arrows above the figure indicate the time points of additional 1-s saturating flashes; the black boxes indicate periods without actinic light. Note that all cells in each panel have been recorded simultaneously as a film, excluding that the drastic switches are caused by a measuring artifact. Each panel represents one example of an FKM record (two-dimensional data set = film), and each kinetic trace represents either one cell or a group of cells that displayed identical fluorescence kinetics within that FKM record. In sample A, all shown cells except bright active were on the same trichome; in the other samples, all cells were in the same trichome.

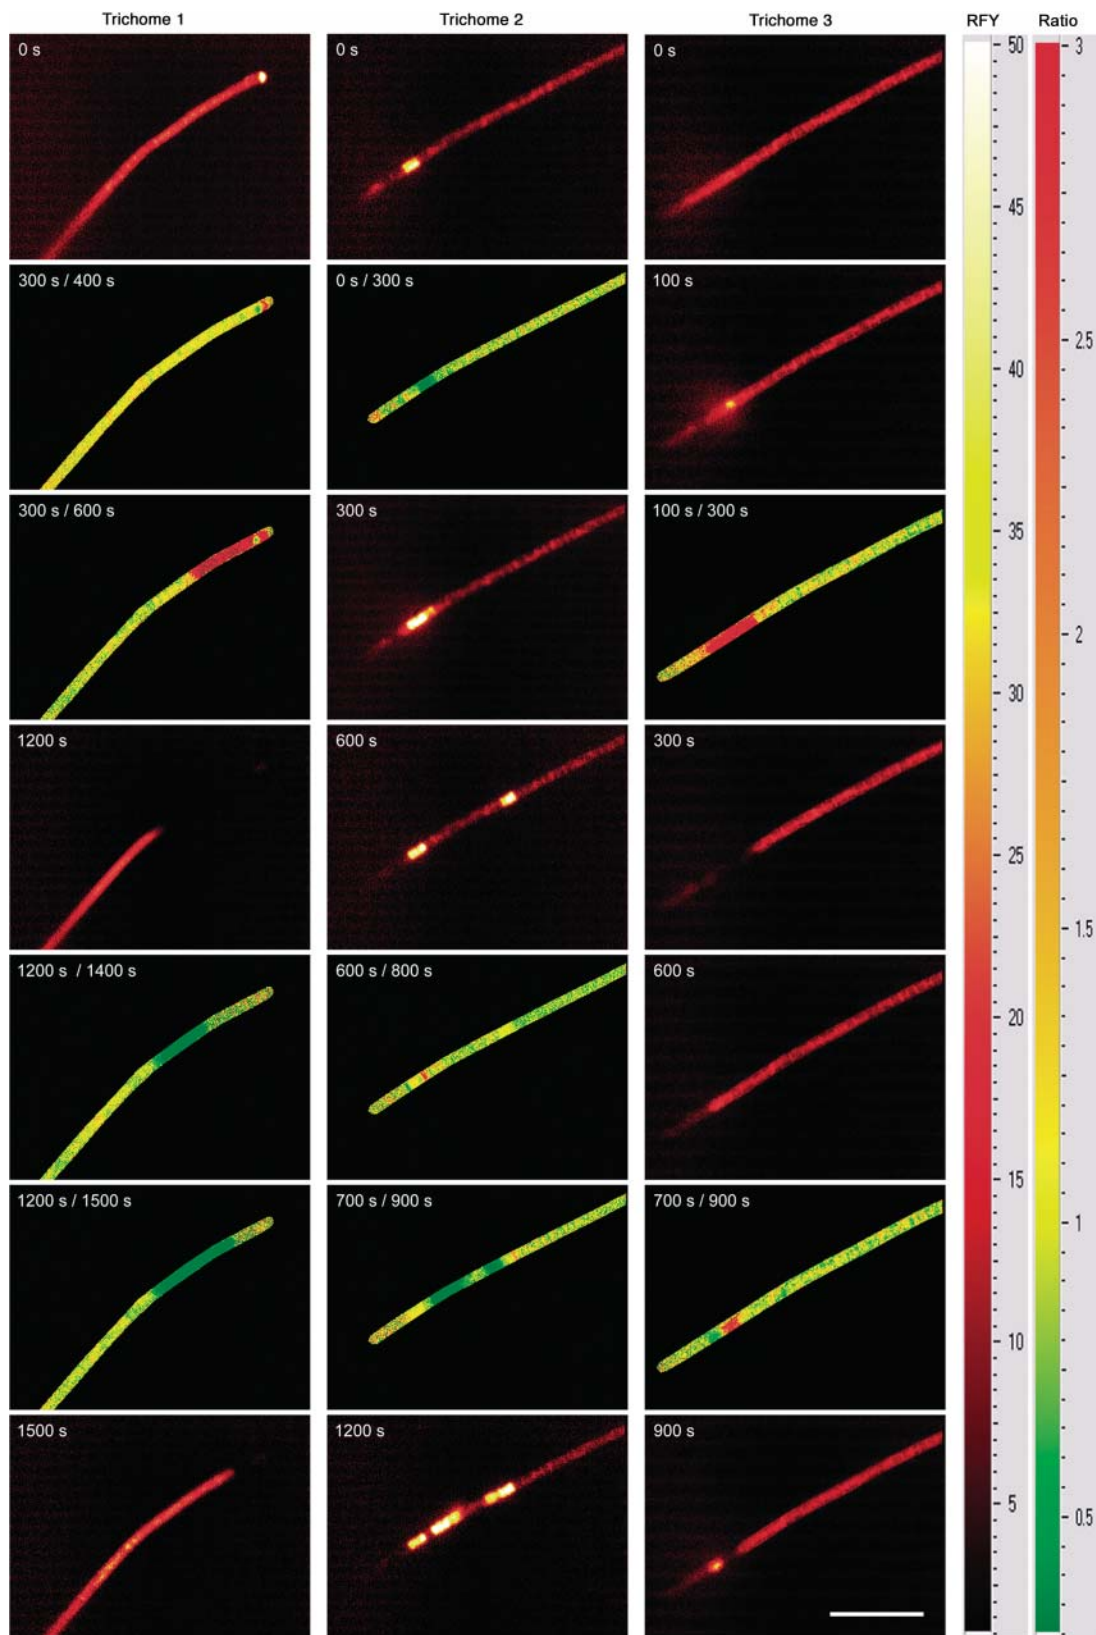

**Figure 4.** FKM parameter images showing the spatial and temporal distribution of reversible switches between different fluorescence states. The data were recorded under measuring light during the period of nitrogen fixation. The images in the glow color scale show the actual fluorescence yield (white = high  $\rightarrow$  yellow  $\rightarrow$  red  $\rightarrow$  black = low fluorescence yield). The images in red-yellow-green color scale show changes in fluorescence yield as a ratio of the first divided by the second image (red = decrease, yellow = constant, green = increase; areas without cells are labeled black). The scale bar in the lower right image represents 50  $\mu\text{m}$ .

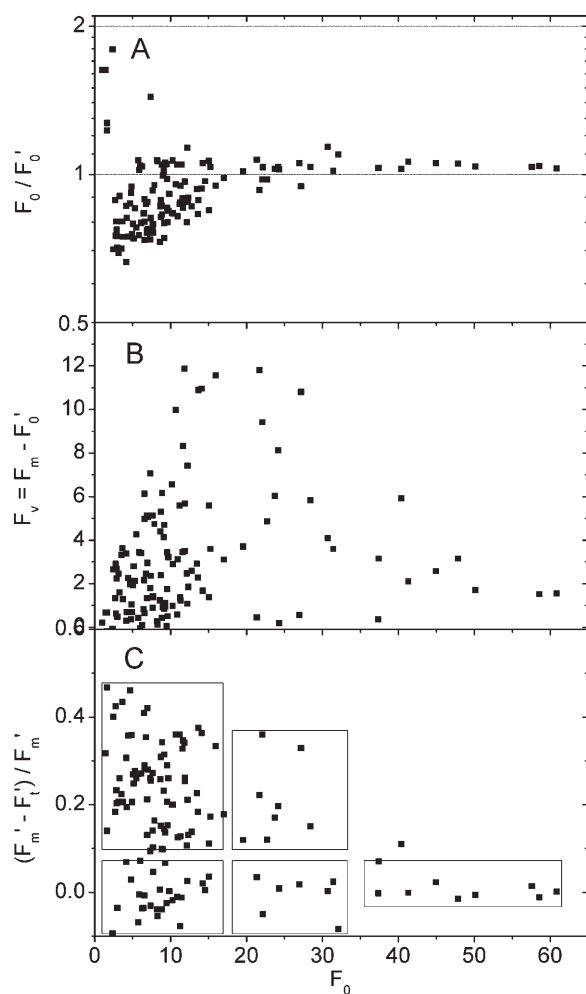

**Figure 5.** Correlation between basic fluorescence yield ( $F_0$ ) and photosynthetic parameters in the control culture at an actinic irradiance of  $60 \mu\text{mol m}^{-2} \text{s}^{-1}$  blue (400–490 nm) light. As in Figures 2 and 6, each data point in the graphs represents one cell or one group of neighboring cells in the same trichome that was identical in all fluorescence kinetic parameters. The boxes indicate the groups as shown also in Figures 2 and 6. The data points (kinetics of selected objects) shown here are the same as shown in Figure 6. A,  $F_0$  versus  $F_0'$ . One cell, with an  $F_0$  of 30 and an  $F_0'/F_0$  of 4.5, is not shown in order to make the distribution of the other values more visible. B, Variable fluorescence versus  $F_0$ . C, Efficiency of PSII versus  $F_0$ .

to estimate the nonphotochemical quenching ( $Q_{np}$ ) known from green plants (Schreiber et al., 1986; Bilger and Björkman, 1990; van Kooten and Snel, 1990).  $Q_{np}$  showed an opposite and weaker diurnal trend than that measured for photochemical quenching (i.e. PSII activity).  $Q_{np}$  increased during the period of nitrogen fixation (Fig. 6, fourth row) due to the tendency of the bright cells to return to lower  $F_0$  levels. Comparison of the activity states, however, showed that the increased  $Q_{np}$  during the diazotrophic period was due to a drastically increased  $Q_{np}$  of both the bright and the very bright cells compared to the cells with normal  $F_0$  (Fig. 7). The low-fluorescence cells displayed no significant ( $P = 0.05$ )  $Q_{np}$ .

### Effect of Oxygen Concentrations

**Fluorescence Yield.** Cultures exposed to high-oxygen stress displayed about 30% reduction of the normal  $F_0$  (Fig. 6C) and a completely different pattern in the appearance of bright cells as compared to the control cultures (Figs. 1C and C). Two peaks in the number of bright cells were measured; the first directly after the onset of the photoperiod (correlating with nitrogen fixation; Fig. 1B) and the second in the afternoon/evening when nitrogen fixation was low or absent (Fig. 6, A and 6C). Analysis of basic fluorescence yield (Fig. 6) showed that all the bright cells that appeared in the evening belonged to the very bright type as described above, i.e. they had an  $F_0 > 35$  (despite the diminished normal  $F_0$  of this culture) and low PSII activity. In contrast, some of the bright cells in the morning belonged to the type that had an  $F_0$  only about double the normal state (Fig. 6C) and an active PSII as shown for the bright cells of the control culture (Fig. 7).

For cultures adapted to low-oxygen stress ( $> 24$  h) the basic fluorescence ( $F_0$ ) was not significantly ( $P = 0.9$ ) different from that of the control (Fig. 6B). The major difference between the low-oxygen and the air-control treatments was a much lower percentage of bright cells in the former. Low oxygen also yielded the total absence of very bright cells with an  $F_0 > 35$ . The few bright cells that did occur all belonged to those with an  $F_0$  not more than double the normal level (Fig. 6B) and the relatively high variable fluorescence characteristic of this physiological state (see above).

**Photochemical and Nonphotochemical Quenching.** In contrast to the pronounced diurnal cycle of photochemical activity of the control culture, the high-oxygen culture did not display any clear pattern (Fig. 6, F and I) and contained fewer photochemically active cells [i.e. with high  $(F_m' - F_0')/F_m'$ ] throughout the diurnal cycle (compare points with high  $F_v$  values in Fig. 6, D and F). The low-oxygen culture showed a daily cycle of photochemical activity, but less pronounced than the control (Fig. 6, E and H), because of the absence of very bright cells. There was no obvious difference between the average photochemical activity of the low-oxygen compared to the control culture (Fig. 6, G and H). Similar to the observed pattern of photochemical quenching, the daily cycle of  $Q_{np}$  (mainly related to transitions of activity state, not conventional  $Q_{np}$ ; see above) was much weaker for the low-oxygen culture compared to the control culture, and almost absent in the high-oxygen culture (Fig. 6, fourth row).

### DISCUSSION

Comparing the nitrogenase measurements with the FKM measurements, it is obvious that nitrogenase activity only occurs when there are cells with elevated basic fluorescence yield ( $F_0$ ), termed bright cells, confirming our earlier results (Berman-Frank et al.,



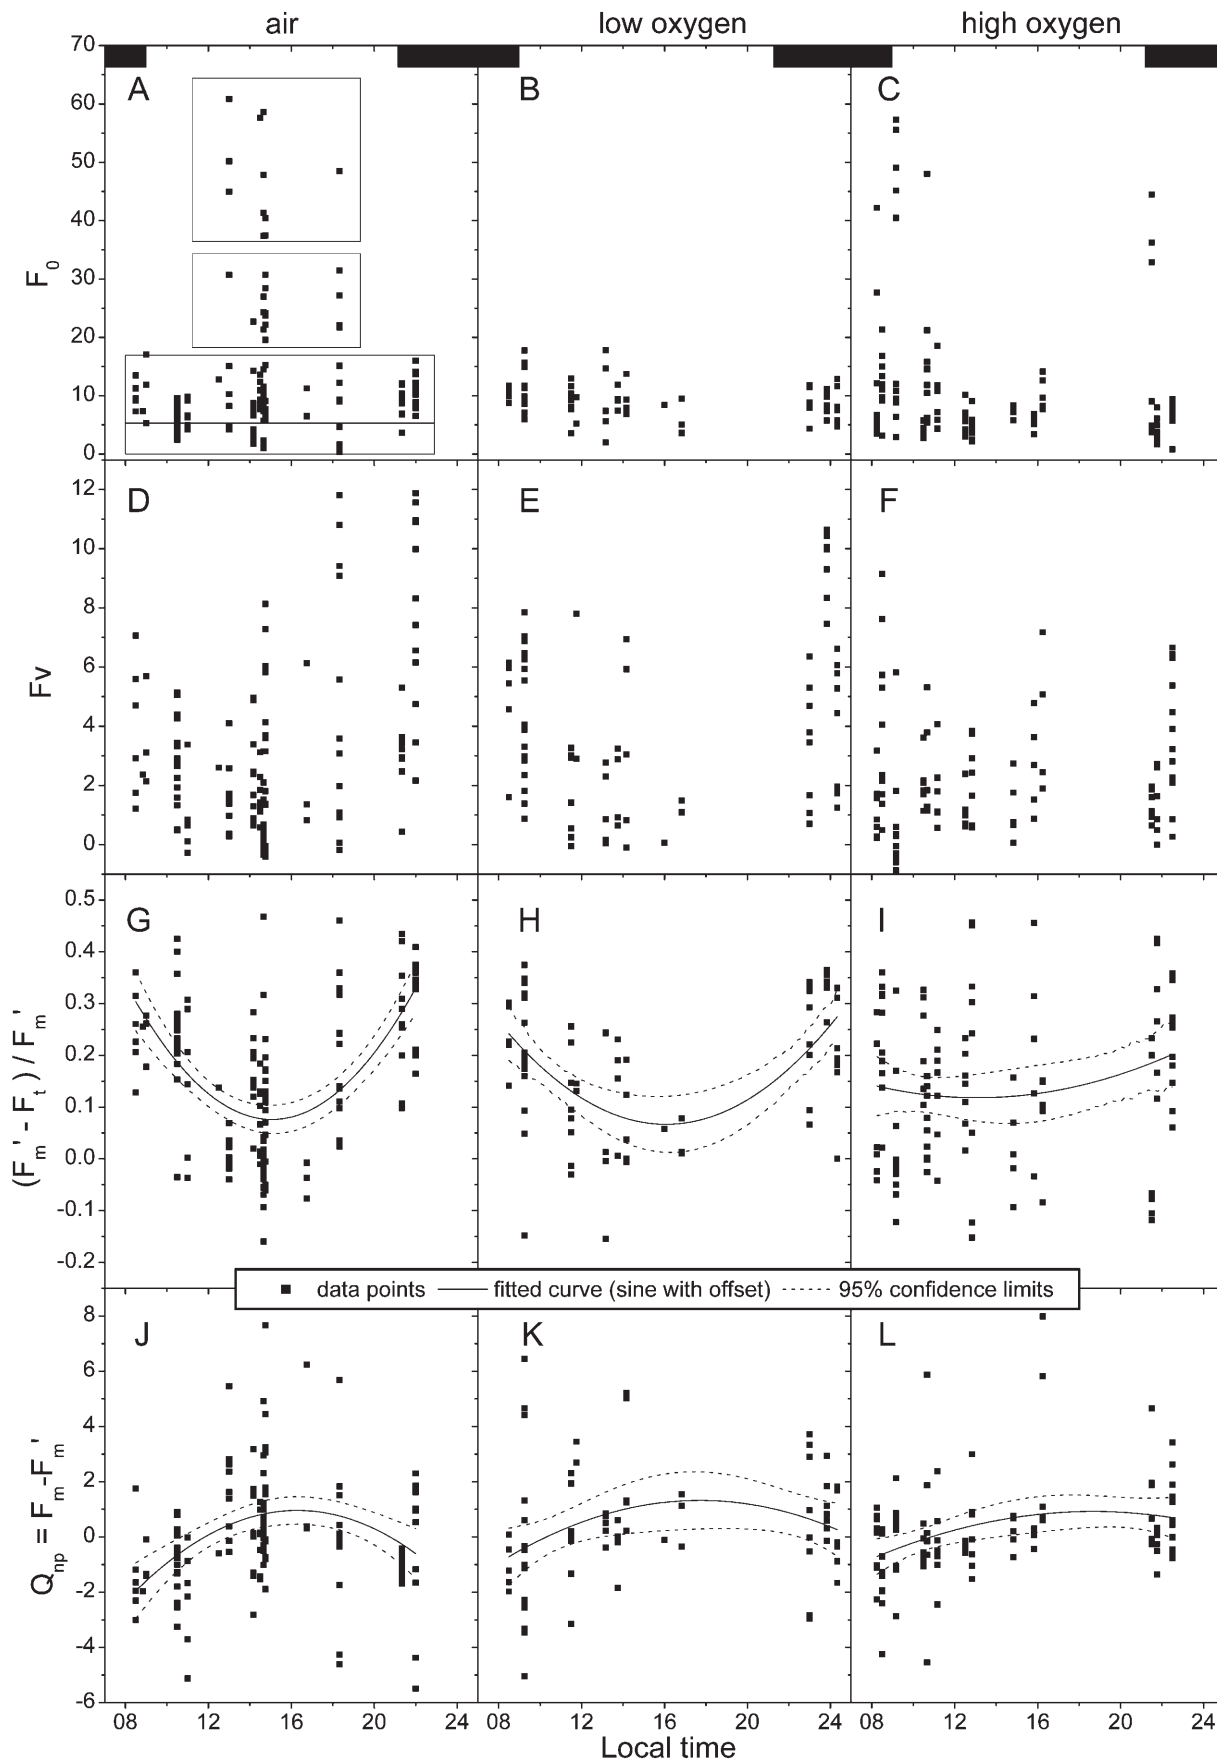

Figure 6. (Legend appears on following page.)



2001b). Yet, this study also shows that bright cells may occur without the presence of nitrogenase activity. While in the control culture the percentage of bright cells directly correlated with the nitrogenase activity, in the high-oxygen culture, bright cells also occurred in the evening and night in the absence of nitrogenase activity. A closer look revealed that this was related to the occurrence of two distinct types of bright cells—one with active and one with inactive PSII.

Bright cells with values of  $F_0$  two- to threefold higher than normal non-diazotrophic cells (type I bright cells) had fluorescence characteristics indicating that PSII still retains an activity similar to the non-diazotrophic state. Such cells occurred exclusively during the period of nitrogen fixation and their frequency was proportional to the rate of nitrogen fixation. Due to its inherent sensitivity to oxygen, nitrogenase can only coexist with a fully functional PSII if the latter does not lead to a net production of oxygen. This can be achieved if the activity of PSII is used to transport electrons ultimately used through photosystem I (PSI) for oxygen-consuming processes. The most likely scenario for high  $F_0$  of type I bright cells seems to be a change of the association of the phycobilisome antenna from a coupling with the generally less fluorescent PSI to a coupling with the more fluorescent PSII, thus representing a classical state II  $\rightarrow$  state I transition, as observed in other species (Bonaventura and Myers, 1969; Biggins and Bruce, 1989; Campbell et al., 1998; Meunier et al., 1998). The elevated  $F_0$  we measured during state I was most likely caused by the very low ratio of PSII to PSI that is characteristic for *Trichodesmium* (Berman-Frank et al., 2001a) and will thus leave surplus, free phycobilisomes upon a state II  $\rightarrow$  state I transition. Nutrient deficiency, such as iron, has also been observed to bring about dramatic changes in  $F_0$  associated with uncoupled phycobilisomes (Behrenfeld and Kolber, 1999). Iron limitation inhibited the synthesis of the iron-rich PSI, so that a state I  $\rightarrow$  state II transition led to surplus, uncoupled phycobilisomes. Our cultures were iron replete, with more PSI than PSII, as characteristic for *Trichodesmium* (Berman-Frank et al., 2001a), so that the elevated  $F_0$  would be caused by the opposite state transition. Funneling of excitation energy to PSII during state I would stimulate the activity of PSII, which is required for pseudocyclic electron

transport from water via PSII and back to oxygen, via the Mehler reaction, in this way compensating for net oxygen production while increasing the energy supply to nitrogenase. Earlier studies on *Trichodesmium* indicated an enhanced Mehler reaction (Kana, 1993; Berman-Frank et al., 2001b) and an unusually high dark respiration (Carpenter and Roenneberg, 1995). Our results, demonstrating that the diazotrophic bright cells have an active PSII, provide further support for a role of the Mehler reaction in the nitrogen fixation strategy of *Trichodesmium*. The unicellular cyanobacterium *Cyanothece* also displays a state II  $\rightarrow$  state I transition and a corresponding increase of  $F_0$  during nitrogen fixation (Meunier et al., 1997, 1998; for review, see Sherman et al., 1998). In *Cyanothece*, however, the state II  $\rightarrow$  state I transition related to nitrogen fixation occurs in the middle of the scotoperiod, with nitrogen fixation fueled by respiratory exhaustion of carbohydrates, and therefore is not related to photosynthesis (Meunier et al., 1997). In *Trichodesmium*, PSII activity directly contributes to nitrogen fixation (Berman-Frank et al., 2001b). Despite these two fundamental differences, there may be an important similarity between the physiological mechanisms of these two organisms. In *Cyanothece*, the state II  $\rightarrow$  state I transition during nitrogen fixation is caused by exhaustion of the carbohydrate storage, resulting in an oxidation of the plastoquinone pool (Meunier et al., 1997). A similar situation likely exists in *Trichodesmium*, which displays a much higher dark respiration than other cyanobacteria (Carpenter and Roenneberg, 1995), and it is further increased during the period of nitrogen fixation (Berman-Frank et al., 2001b). Running into this limitation of carbohydrates and the subsequent state II  $\rightarrow$  state I transition in the light rather than the dark may be the main reason why *Trichodesmium* fixes more nitrogen per Chl than *Cyanothece* (Berman-Frank et al., 2003), because it can utilize the state I for carrying out the Mehler reaction and thereby overcome the limitation by carbohydrates. Revealing the differences in the genetic regulation of the circadian rhythms (for review, see Ditty et al., 2003) of *Trichodesmium* versus *Cyanothece* will be an interesting subject for future studies.

In contrast to type I bright cells, type II bright cells (very bright cells) with the highest fluorescence yield (up to 10 times higher than the average of non-

**Figure 6.** Diurnal cycle of photosynthetic activity and influence of variations in oxygen concentration. As in Figures 2 and 5, each data point in the graphs represents one cell or one group of neighboring cells in the same trichome that was identical in all fluorescence kinetic parameters. Usually several data points were recorded at the same time because several cells were selected in the same two-dimensional measurement (film) and several films were recorded from the same cell preparation. The kinetic records of the same cells/objects were analyzed not only for all panels within one column of this figure, but also for all parameters shown in Figures 2, 5, and 7. The dashed boxes in A indicate the classification of the physiological states correlating to  $F_0$ . The black boxes in the first row of graphs indicate the dark period (9 PM–9 AM). All data were measured at an actinic irradiance of  $60 \mu\text{mol m}^{-2} \text{s}^{-1}$  blue (400–490 nm) light. The parameter  $(F'_m - F'_i)/F'_m$  is mainly shown for comparison with previous studies; because of the variations in  $F_0$  studied here, it cannot be used in its conventional sense, i.e. as a measure of PSII efficiency. For the latter, the non-normalized parameters should be used instead. First row,  $F_0$ ; second row,  $F_v$ ; third row,  $(F'_m - F'_i)/F'_m$ ; fourth row,  $Q_{np} = F_m - F'_m$ . Left column, Control (air); middle column, 5% oxygen; right column, 50% oxygen.

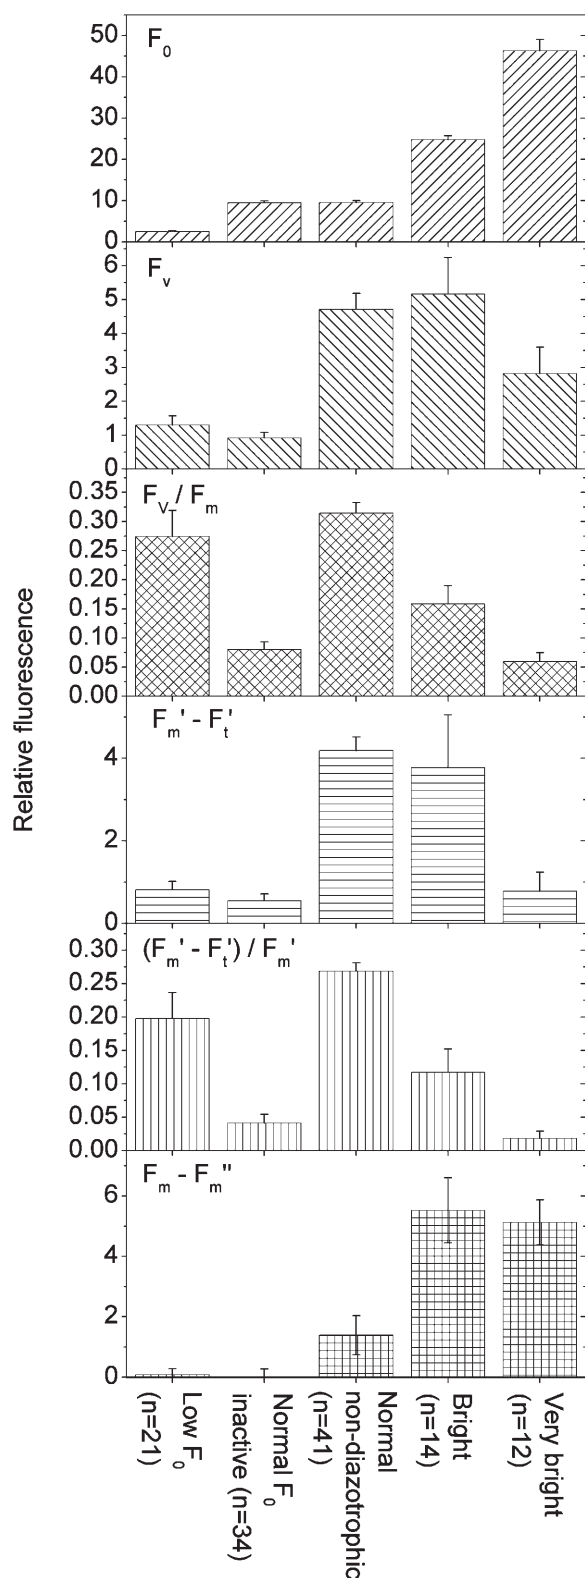

**Figure 7.** Fluorescence kinetic parameters of the different physiological states of *Trichodesmium* cells. All data were taken from the control culture and measured at an actinic irradiance of  $60 \mu\text{mol m}^{-2} \text{s}^{-1}$  blue (400–490 nm) light. The definition of the groups by the level of basic fluorescence was used as shown in Figures 2, 5, and 6, i.e. cells with  $F_0 < 5$  were regarded as low  $F_0$  (quenching),  $5 < F_0 < 18$  as normal,

diazotrophic cells, Fig. 3) had a much lower PSII activity than the normal non-diazotrophic cells, possibly indicating a complete uncoupling of the phycobilisome antenna from both PSII and PSI. With the antenna uncoupled, a maximum percentage of photons captured by the antenna would be re-emitted. In addition to the low PSII activity, the occurrence of type II bright cells, in the high-oxygen culture, independently of nitrogen fixation indicates that they have another role. Their absence in the low-oxygen culture clearly shows that they only occur under conditions of oxidative stress. Currently, we do not know whether the mechanism causing the high  $F_0$  of these cells is a defense against oxidative stress (shut down of oxygen production through PSII), or whether oxidative damage leads to damage of the PSII reaction center and through this to an uncoupling of the antenna, so that the cells can subsequently only switch between  $F_0$  levels, but never display the variable fluorescence that indicates PSII activity.

The high fluorescence of both type I and type II bright cells cannot be related to protein or pigment degradation or synthesis, as the cells reversibly

$19 < F_0 < 35$  as bright type I, and  $F_0 > 35$  as very bright (bright type II). The group normal non-diazotrophic refers to all cells with normal fluorescence measured between 12:00 AM to 10:30 AM and between 9:00 PM to 12:00 AM, and was defined this way to exclude those cells that had normal  $F_0$  but occurred during the photosynthetically inactive recovery phase after nitrogen fixation. The group normal  $F_0$  inactive includes all cells with normal  $F_0$  (see above) with an  $F_v/F_m$  lower than the average of the normal non-diazotrophic group and measured during the diazotrophic period. As in Figure 2, the parameters  $(F_m' - F_t')/F_m'$  and  $F_v/F_m$  are mainly shown for comparison with previous studies; because of the variations in  $F_0$  studied here, they cannot be used in their conventional sense, i.e. as a measure of PSII efficiency. For the latter, the non-normalized parameters should be used instead. The number of samples ( $n$ ) refers to the number of objects within the group. As in all other figures, each object represents a cell or a group of neighboring cells that was identical in fluorescence kinetics; the objects shown here are the same as shown in Figures 2, 5, and 6. All groups were highly significantly ( $t$  tests,  $P < 0.01$ ) different for all tested parameters ( $F_0$ ,  $F_v$ ,  $F_v/F_m$ ,  $F_m' - F_t'$ ,  $(F_m' - F_t')/F_m'$ ,  $F_m - F_m''$ ), except for the following  $t$  tests (Q, quenching; NI, normal  $F_0$  inactive; NA, normal non-diazotrophic; B, bright type I; V, very bright [bright type II]): (1)  $F_0$  was not significantly different between NI and NA ( $P = 0.96$ ). (2)  $F_v$  was not significantly different between Q and NI ( $P = 0.20$ ) and between NA and B ( $P = 0.66$ ). (3)  $F_v/F_m$  was not significantly different between Q and NA ( $P = 0.33$ ), between Q and B ( $P = 0.07$ ), and between NI and V ( $P = 0.38$ ). (4)  $F_m' - F_t'$  was not significantly different between NI and V ( $P = 0.55$ ), between Q and NI ( $P = 0.31$ ), between Q and V ( $P = 0.94$ ), and between NA and B ( $P = 0.66$ ). (5)  $(F_m' - F_t')/F_m'$  was not significantly different between Q and B ( $P = 0.17$ ) and between NI and V ( $P = 0.25$ ). (6)  $Q_{np} = F_m - F_m''$  was not significantly different between Q and NI ( $P = 0.80$ ), between Q and NA ( $P = 0.16$ ), and between B and V ( $P = 0.77$ ). (7) The  $P$  value of the differences in  $F_0$  was 0.03 for Q versus V, and 0.05 for NA versus V and B versus V. The  $P$  value of the difference in  $F_v/F_m$  was 0.01 for B versus V. The  $P$  value of the  $F_m' - F_t'$  comparison was 0.04 for B versus V. The  $P$  value of the difference in  $Q_{np} = F_m - F_m''$  was 0.07 for NI versus NA. The  $P$  value of the difference in  $(F_m' - F_t')/F_m'$  was 0.03 for NI versus B and 0.02 for B versus V.

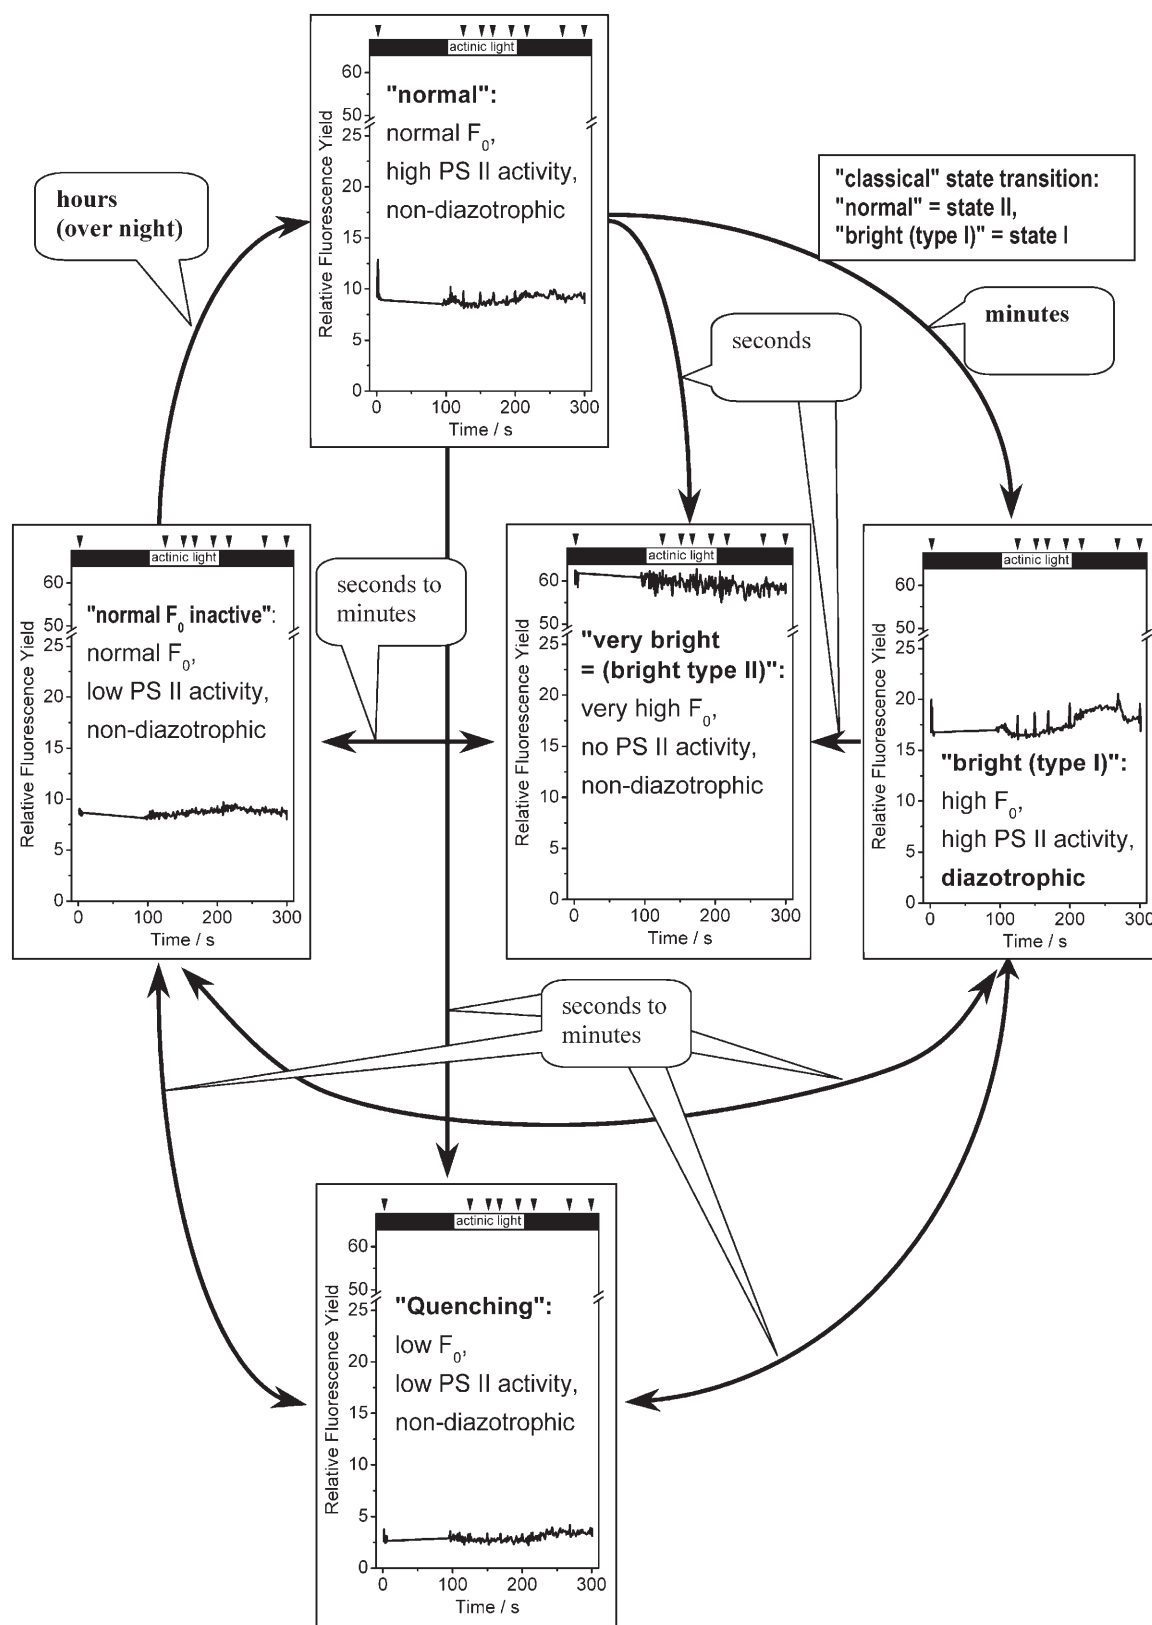

**Figure 8.** Scheme illustrating the proposed roles of the different physiological activity states observed in this study, and approximate range of the observed interconversions between the activity states. The definition of the activity states is the same as in Figure 7. The graphs in each panel show examples of the fluorescence kinetics of cells in these activity states, measured at an actinic irradiance of about  $1,300 \mu\text{mol m}^{-2} \text{s}^{-1}$  blue (400–490 nm) light. The arrows above the figure indicate the time points of saturating flashes; the black boxes indicate periods without actinic light.

switched between the different fluorescence states within a few seconds. In contrast, phycobilisomes are known to diffuse rapidly (in seconds) between PSII and PSI (e.g. Sarcina et al., 2001), leading to rapid changes in fluorescence yield as a result of their coupling/uncoupling with photosystems. The return to lower  $F_0$  within seconds also excludes photoinhibition from being the mechanism behind the type II bright cells, as recovery from photoinhibition is always at least in the range of minutes (Kyle et al., 1987). Moreover, photoinhibition has not been reported to cause a strong increase of  $F_0$ , and is unlikely under the low growth and measuring irradiances we used, or in the dark when type II bright cells appeared under high-oxygen stress.

In addition to the two types of bright cells, cells with unusually low Chl fluorescence yield also appeared during the diazotrophic period. Their color did not indicate any change in pigment content, and also the return to normal fluorescence within a few minutes excluded pigment degradation from being the reason for their diminished fluorescence. It is therefore most likely that they represent another type of antenna coupling/uncoupling, one that leads to quenching of most of the captured excitation energy. This is not, however,  $Q_{np}$  in the conventional sense, i.e. a quenching that occurs in response to actinic light exposure and is therefore measured as a difference in the response to saturating flashes in the dark- and the light-adapted state (e.g. Maxwell and Johnson, 2000; Roháček, 2002). The latter parameter was zero in contrast to all other activity states. The much lower fluorescence yield of these cells affected the basic fluorescence ( $F_0$ ) and the variable fluorescence proportionally. Consequently, calculating the parameters of the remaining (very feeble) fluorescence resulted in relatively high values for  $F_v/F_m$  (the maximum photochemical activity of PSII) and  $(F'_m - F'_t)/F'_m$  (the activity of electron transport through PSII). In these cells, the activity of PSII may be quenched in a way that leads to thermal relaxation of all excitons, so that they do not emit any fluorescence. The fluorescence quenching is likely due to an impaired donor side (e.g. oxygen-evolving complex) of the PSII reaction center; this would lead to a P680<sup>+</sup> trap that dissipates excitons as heat (Meunier et al., 1998; Sherman et al., 1998). Alternatively, the quenching may also be caused by the coupling of antennae to an unknown quencher. The small percentage of normally working PSII yields the measured remaining fluorescence. Furthermore, the observed switches into the quenching state usually occurred immediately following the bright (type I or type II) state, and cells returning from the quenching state to normal  $F_0$  still displayed the low variable fluorescence of the quenching state (leading to very low  $F_v/F_m$  values; normal  $F_0$  inactive state). We did not observe a clear separation between the activities of the normal  $F_0$  inactive and the normal non-diazotrophic cells (Fig. 5). These two characteristics indicate that the low fluorescence state represents a period of recovery

and reconfiguration of photosynthesis after nitrogen fixation, gradually returning to the normal non-diazotrophic state via the normal  $F_0$  inactive intermediate. Figure 8 summarizes the roles and interconversions of the physiological activity states as discussed above.

If several cells in a filament switched, they often did not do so randomly, but sequentially (like traffic lights). Nitrogenase is frequently localized in clusters of *Trichodesmium* cells (Lin et al., 1998; Berman-Frank et al., 2001b), so that a clustering of the switches between activity states might be expected. But it still would not exclude random switches within the cell cluster. The sequential switching between cells suggests that there is a direct interaction between neighboring cells, which operates to reduce oxygen diffusion into a nitrogen-fixing cell from its neighbors. This would be especially beneficial in an organism that does not permanently differentiate specialized cells for nitrogen fixation, so that its diazotrophic cells do not possess diffusion barriers such as those found in heterocysts.

Remarkably, not only the high-oxygen, but also the low-oxygen treatment resulted in strongly inhibited growth and nitrogen fixation in *Trichodesmium*. The low rates in the high-oxygen culture can easily be explained by an increased oxidative damage to the Fe<sub>4</sub>S<sub>4</sub> clusters in one of the nitrogenase subunits (Burgess and Lowe, 1996), proteolysis (Durner et al., 1996), suppression of nitrogenase synthesis, and post-translational modification (Gallon, 1992; Bergman et al., 1997), as observed also in other diazotrophic cyanobacteria. In many cyanobacteria, however, lower than atmospheric oxygen concentrations result in normal or even enhanced nitrogen fixation due to the diminished inhibition of nitrogenase (Bergman et al., 1997). On time scales of minutes to hours in the photo-period, also in *Trichodesmium*, diminished oxygen stress results in enhanced nitrogen fixation, with activity peaking between 2.5% to 5% oxygen (Ohki and Fujita, 1988; I. Berman-Frank, unpublished data). The diminished oxidative stress also leads to the absence of type II bright cells. However, during longer exposure to low oxygen, as in this study (cells in 5% oxygen for over 24 h), the unusually high dark respiration in *Trichodesmium* (Carpenter and Roenneberg, 1995) may cause a permanent over-reduction of the plastoquinone pool. This would lead to a permanent state I of photosynthesis, i.e. the observed almost constant number of type I bright cells throughout the diurnal cycle. But, at the same time, such reduced conditions most likely render the Mehler reaction and thereby the nitrogen fixation of *Trichodesmium* inefficient. This is probably exacerbated during the night, when the strong respiration cannot be balanced by oxygenic photosynthesis, leading to a further decline in intracellular oxygen concentrations. This likely induces damage by anaerobiosis, enhanced mortality, and a biomass crash after about 3 d of exposure to low-oxygen concentrations (I. Berman-Frank, unpublished data).



## CONCLUSIONS

FKM allowed, for the first time, a detailed study on a single-cell level of the diurnal regulation of photosynthesis in a diazotrophic cyanobacterium. We show that, in *Trichodesmium*, the coordination of photosynthesis and nitrogen fixation involves a complicated spatial and temporal pattern of reversible alternation of photosynthetic activity states. These activity states provide the coordination and fine tuning required to utilize electron transport via PSII for nitrogen fixation, and to minimize the inhibitory effects of photosynthetic oxygen evolution on nitrogenase in a non-heterocystous organism fixing and assimilating nitrogen during the photoperiod. External oxygen concentrations lower or higher than that of air can modulate the coupling between nitrogen fixation and the photosynthetic activity states. On time scales longer than a few hours, however, this interactive modulation is not sufficient, so that processes like oxidative damage to nitrogenase or lack of respiratory substrates result in inhibited nitrogen fixation and growth. Thus, the traffic lights control on the coupling between photosynthetic activity and nitrogen fixation in *Trichodesmium* may provide an optimal strategy allowing *Trichodesmium* to thrive in the subtropical and tropical oceans at present atmospheric oxygen concentrations.

## MATERIALS AND METHODS

### Culture Media and Culture Conditions

Cultures of *Trichodesmium* IMS101 were grown in sterile filtered natural seawater, with the addition of 4  $\mu\text{M}$  Fe-EDTA in cylindrical tubes of 3-cm diameter and 100-mL culture volume. The tubes were aerated at a flow rate of 100 mL  $\text{min}^{-1}$  with either air (approximately 20%  $\text{O}_2$ ), 50%  $\text{O}_2$  + 50%  $\text{N}_2$  + 0.035%  $\text{CO}_2$ , or 5%  $\text{O}_2$  + 95%  $\text{N}_2$  + 0.035%  $\text{CO}_2$  for at least one complete light/dark cycle before the measurements were started, in order to adapt the cells to the gas conditions. The experiment was carried out twice; the cultures were diluted to  $\text{OD}_{750} = 0.1$  at the start of each experiment. The cultures were maintained at a 12 h daylength (9:15 AM–9:15 PM local time) and 26°C day/24°C night temperature. The photon flux density during the light period was 100  $\mu\text{M m}^{-2} \text{s}^{-1}$  supplied by cool-white OSRAM (Munich) fluorescent tubes.

### Preparation of Samples for FKM Measurements

About 2 mL of cell suspension were taken from the culture tubes, and most of the medium was removed by gentle filtration through a membrane filter. Cells were resuspended in 100  $\mu\text{L}$  medium, transferred to the window of the measuring chamber (Küpper et al., 2000a), and a 2% solution of ultralow-melting (melting point 25°C) agarose in seawater was added before sealing the chamber with gas-permeable cellophane. Tightening the cellophane distributed the cells, embedded in the agarose, in a thin film between the cellophane and the chamber window. The chamber was temperature controlled and pumped through with 100 mL  $\text{min}^{-1}$  medium (25°C, saturated with the gas mixture also used for cultivating the cells). To minimize handling artifacts, fresh samples were prepared for each time point.

### FKM Measurements and Data Analysis

Photosynthetic performance was measured using the fluorescence kinetic microscope described by Küpper et al. (2000a), with the following modifications that were introduced by Ferimazova et al. (2002).

1. A sensitive, nonintensified CCD camera (the camera of the FluorCam system [version 700M] from Photon Systems Instruments [Brno, Czech Republic]) was used instead of the intensified one. This substitution resulted in improved spatial resolution and decreased noise, as discussed in detail (at that time as a perspective for future developments) by Küpper et al. (2000a).
2. Nonactinic measuring light was produced by a xenon flash lamp equipped with a set of filters to produce a spectrum similar to the earlier used LED (blue light, about 400–490 nm). The resulting measuring light irradiance was about 14  $\mu\text{mol m}^{-2} \text{s}^{-1}$ . This substitution allowed for a better comparison of total fluorescence levels, because the LEDs used earlier had to be used at very high currents that caused it to age (leading to a drop of output) rather rapidly.

The applied spectrum of the excitation light (400–490 nm for actinic, measuring, and saturating light) almost exclusively excited Chl and the short-wavelength form of phycoerythrin (phycourobilin or CU phycoerythrin); compare optical properties of *Trichodesmium* (Subramaniam et al., 1999).

The measurements were performed with an automatic subtraction of background signals and a maximum time resolution of 80 ms. A lower time resolution was applied for the slower kinetics. Each image of the resulting fluorescence kinetic records had a resolution of  $300 \times 400$  pixels at 256 gray values (8 bits). The FKM was also used as a regular epifluorescence microscope to observe the cultures and count the percentage of bright cells.

### Analysis of Fluorescence Kinetic Records

The original two-dimensional data, i.e. films of Chl fluorescence kinetics, were analyzed using the FluorCam software (Photon Systems Instruments) in the following way: Images of  $F_m$ ,  $F_0$ ,  $F_s$ ,  $F_v/F_m$ , etc. were generated as described in detail earlier (Küpper et al., 2000a). The heterogeneity visible on these images was used to select cells for further analysis. The selected cells were passed again through the analysis routine, which resulted in fluorescence kinetic traces representing the average of the kinetics of all pixels within the chosen objects. The individual kinetic traces obtained in this way were exported for further numerical analysis.

In this study, both the variable fluorescence ( $F_v = F_m - F_0$  and  $F'_m - F'_0$ ) and the nonphotochemical quenching ( $Q_{np} = F_m - F'_m$ ) were calculated without the conventional normalization to  $F_m$ , as the latter causes an artefactual decrease of PSII activity upon an increase of  $F_0$  at constant variable fluorescence (Behrenfeld and Kolber, 1999).

### Measurement of Nitrogen Fixation

Nitrogenase activity was assayed by the acetylene reduction method. Samples of 10-mL volumes were taken from all three cultures at five time points throughout the daily cycle. Samples were incubated in gas-tight glass vials, in which 10 mL air were exchanged with 10 mL acetylene, for 1 h under the same light and temperature conditions as the cultures. Afterward, 5 mL of the gas phase in the vials were taken out and analyzed by gas chromatography.

### Chl Concentration

Chl was assayed by filtration on 5- $\mu\text{m}$  polycarbonate filters, extraction with 100% acetone, recording the absorbance spectra from 550 to 750 nm recorded, and analyzing the spectra using the Gauss-Peak-Spectra method according to Küpper et al. (2000b).

## ACKNOWLEDGMENTS

We are very grateful to Martin Trtílek (Photon Systems Instruments, Brno, Czech Republic) for continuous support and updates on the Fluorescence Kinetic Microscope and FluorCam Software, and to Ondrej Prášil (Institute of Microbiology, Academy of Sciences of the Czech Republic) for facilitating this study.

Received May 8, 2004; returned for revision June 9, 2004; accepted June 9, 2004.

## LITERATURE CITED

- Behrenfeld MJ, Kolber ZS (1999) Widespread iron limitation of phytoplankton in the south pacific ocean. *Science* **283**: 840–843
- Bergman B, Gallon JR, Rai AN, Stal LJ (1997) N<sub>2</sub> fixation by non-heterocystous cyanobacteria. *FEMS Microbiol Rev* **19**: 139–185
- Berman-Frank I, Cullen JT, Shaked Y, Sherrell RM, Falkowski PG (2001a) Iron availability, cellular iron quotas, and nitrogen fixation in *Trichodesmium*. *Limnol Oceanogr* **46**: 1249–1260
- Berman-Frank I, Lundgren P, Chen Y-B, Küpper H, Kolber Z, Bergman B, Falkowski P (2001b) Segregation of nitrogen fixation and oxygenic photosynthesis in the marine cyanobacterium *Trichodesmium*. *Science* **294**: 1534–1537
- Berman-Frank I, Lundgren P, Falkowski P (2003) Nitrogen fixation and photosynthetic oxygen evolution in cyanobacteria. *Res Microbiol* **154**: 157–164
- Biggins J, Bruce D (1989) Regulation of excitation energy transfer in organisms containing phycobilins. *Photosynth Res* **20**: 1–34
- Bilger W, Björkman O (1990) Role of the xanthophyll cycle in photoprotection elucidated by measurements of light-induced absorbance changes, fluorescence and photosynthesis in leaves of *Hedera canariensis*. *Photosynth Res* **25**: 173–185
- Bonaventura C, Myers J (1969) Fluorescence and oxygen evolution from *Chlorella pyrenoidosa*. *Biochim Biophys Acta* **189**: 366–383
- Burgess BK, Lowe DJ (1996) Mechanism of molybdenum nitrogenase. *Chem Rev* **96**: 2983–3011
- Campbell D, Hurry V, Clarke AK, Gustafsson P, Öquist G (1998) Chlorophyll fluorescence analysis of cyanobacterial photosynthesis and acclimation. *Microbiol Mol Biol Rev* **62**: 667–683
- Capone DG, Zehr JP, Paerl HW, Bergman B, Carpenter EJ (1997) *Trichodesmium*, a globally significant marine cyanobacterium. *Science* **276**: 1221–1229
- Carpenter EJ, Roenneberg T (1995) The marine planktonic cyanobacterium *Trichodesmium* spp.: photosynthetic rate measurements in the SW Atlantic Ocean. *Mar Ecol Prog Ser* **118**: 267–273
- Ditty JL, Williams SB, Golden SS (2003) A cyanobacterial circadian timing mechanism. *Annu Rev Genet* **37**: 513–543
- Durner J, Bohm I, Knorz OC, Böger P (1996) Proteolytic degradation of dinitrogenase reductase from *Anabaena variabilis* (ATCC 29413) as a consequence of ATP depletion and impact of oxygen. *J Bacteriol* **178**: 606–610
- Ferimazova N, Küpper H, Nedbal L, Trtílek M (2002) New insights into photosynthetic oscillations revealed by two-dimensional microscopic measurements of chlorophyll fluorescence kinetics in intact leaves and isolated protoplasts. *Photochem Photobiol* **76**: 501–508
- Gallon JR (1992) Reconciling the incompatible: N<sub>2</sub> fixation and oxygen. *New Phytol* **122**: 571–609
- Gallon JR (2001) N<sub>2</sub> fixation in phototrophs: adaptation to a specialized way of life. *Plant Soil* **230**: 39–48
- Genty B, Briantais JM, Baker NR (1989) The relationship between the quantum yield of photosynthetic electron transport and quenching of chlorophyll fluorescence. *Biochim Biophys Acta* **990**: 87–92
- Kana TM (1993) Rapid oxygen cycling in *Trichodesmium thiebautii*. *Limnol Oceanogr* **38**: 18–24
- Küpper H, Šetlík I, Trtílek M, Nedbal L (2000a) A microscope for two-dimensional measurements of in vivo chlorophyll fluorescence kinetics using pulsed measuring light, continuous actinic light and saturating flashes. *Photosynthetica* **38**: 553–570
- Küpper H, Spiller M, Küpper F (2000b) Photometric method for the quantification of chlorophylls and their derivatives in complex mixtures: fitting with gauss-peak-spectra. *Anal Biochem* **286**: 247–256
- Kyle DJ, Osmond CB, Arntzen CJ (1987) Photoinhibition. In J Barber, ed, *Topics in Photosynthesis*, Vol 9. Elsevier, Amsterdam, 315 pp
- Lin S, Henze S, Lundgren P, Bergman B, Carpenter EJ (1998) Whole-cell immunolocalization of nitrogenase in marine diazotrophic cyanobacteria, *Trichodesmium* spp. *Appl Environ Microbiol* **64**: 3052–3058
- Maxwell K, Johnson GN (2000) Chlorophyll fluorescence—a practical guide. *J Exp Bot* **51**: 659–668
- Meunier PC, Colón-López MS, Sherman LA (1997) Temporal changes in state transitions and photosystem organization in the unicellular, diazotrophic cyanobacterium *Cyanothece* sp. ATCC 51142. *Plant Physiol* **115**: 991–1000
- Meunier PC, Colón-López MS, Sherman LA (1998) Photosystem II cyclic heterogeneity and photoactivation in the diazotrophic, unicellular cyanobacterium *Cyanothece* Species ATCC 51142. *Plant Physiol* **116**: 1551–1562
- Misra HS, Mahajan SK (2000) Excitation energy transfer from phycobilisomes to photosystems: a phenomenon associated with the temporal separation of photosynthesis and nitrogen fixation in a cyanobacterium, *Plectonema boryanum*. *Biochim Biophys Acta* **1459**: 139–147
- Ohki K, Fujita Y (1988) Aerobic nitrogenase activity measured as acetylene reduction in the marine non-heterocystous cyanobacterium *Trichodesmium* spp. grown under artificial conditions. *Mar Biol* **91**: 9–13
- Postgate JR (1998) *Nitrogen Fixation*, Ed 3. Cambridge University Press, Cambridge, p112
- Roháček K (2002) Chlorophyll fluorescence parameters: the definitions, photosynthetic meaning, and mutual relationships. *Photosynthetica* **40**: 13–29
- Sarcina M, Tobins MJ, Mullineaux CW (2001) Diffusion of phycobilisomes on the thylakoid membranes of the cyanobacterium *Synechococcus* 7942. *J Biol Chem* **278**: 46830–46834
- Schreiber U, Schliwa U, Bilger W (1986) Continuous recording of photochemical and non-photochemical chlorophyll fluorescence quenching with a new type of modulation fluorometer. *Photosynth Res* **10**: 51–62
- Sherman LA, Meunier P, Colón-López MS (1998) Diurnal rhythms in metabolism: a day in the life of a unicellular, diazotrophic cyanobacterium. *Photosynth Res* **58**: 25–42
- Sroga GE, Landegren U, Bergman B, Lagerstrom-Fermer M (1996) Isolation of nifH and part of nifD by modified capture polymerase chain reaction from a natural population of the marine cyanobacterium *Trichodesmium* sp. *FEMS Microbiol Lett* **136**: 137–145
- Subramaniam A, Carpenter EJ, Karentz D, Falkowski PG (1999) Bio-optical properties of the marine diazotrophic cyanobacteria *Trichodesmium* spp. I. Absorption and action spectra. *Limnol Oceanogr* **44**: 608–617
- van Kooten O, Snel JFH (1990) The use of chlorophyll fluorescence nomenclature in plant stress physiology. *Photosynth Res* **25**: 147–150
- Zehr JP, Harris D, Dominic B, Salerno J (1997) Structural analysis of the *Trichodesmium* nitrogenase iron protein—implications for aerobic nitrogen fixation activity. *FEMS Microbiol Lett* **153**: 303–309
